# Supplementary material for: Infliximab is associated with attenuated immunogenicity to BNT162b2 and ChAdOx1 nCoV-19 SARS-CoV-2 vaccines
Source: bioRxiv or medRxiv preprint supplement (doi:10.1101/2021.03.25.21254335), 2021-03-29
Supplement: Supplementary file [file media-1.pdf]

# Supplementary Appendix for ‘Infliximab is associated with attenuated immunogenicity to BNT162b2 and ChAdOx1 nCoV-19 SARS-CoV-2 vaccines’

## Table of Contents

|                                                                                                                                                                                                                          |    |
|--------------------------------------------------------------------------------------------------------------------------------------------------------------------------------------------------------------------------|----|
| Supplementary Table S1: Contributors to the CLARITY IBD study .....                                                                                                                                                      | 2  |
| Supplementary Table S2: Baseline characteristics of all participants in CLARITY IBD following primary vaccination against SARS-CoV-2, stratified by biologic.....                                                        | 18 |
| Supplementary Table S3: Baseline characteristics of participants who had anti-SARS-CoV-2 spike antibodies measured 3 to 10 weeks following primary vaccination against SARS-CoV-2, stratified by vaccine administered... | 19 |

## Supplementary Table S1: Contributors to the CLARITY IBD study

| <b>Affiliation</b>                          | <b>First name</b>                      | <b>Surname</b> |
|---------------------------------------------|----------------------------------------|----------------|
| Barts Health NHS Trust                      | Klaartje                               | Kok            |
|                                             | Farjhana                               | Bokth          |
|                                             | Bessie                                 | Cipriano       |
|                                             | Caroline                               | Francia        |
|                                             | Nosheen                                | Khalid         |
|                                             | Hafiza                                 | Khatun         |
|                                             | Ashley                                 | Kingston       |
|                                             | Irish                                  | Lee            |
|                                             | Anouk                                  | Lehmann        |
|                                             | Kinnari                                | Naik           |
|                                             | Elise                                  | Pabriaga       |
|                                             | Nicolene                               | Plaatjies      |
|                                             | Kevin                                  | Samuels        |
|                                             | Barts Health NHS Trust<br>(paediatric) | Bessie         |
| Kevin                                       |                                        | Samuels        |
| Nicolene                                    |                                        | Plaatjies      |
| Hafiza                                      |                                        | Khatun         |
| Farjana                                     |                                        | Bokth          |
| Elise                                       |                                        | Pabriaga       |
| Caroline                                    |                                        | Francia        |
| Basingstoke and North<br>Hampshire Hospital | Rebecca                                | Saich          |
|                                             | Hayley                                 | Cousins        |
|                                             | Wendy                                  | Fraser         |
|                                             | Rachel                                 | Thomas         |
|                                             | Matthew                                | Brown          |

| <b>Affiliation</b>                                     | <b>First name</b> | <b>Surname</b> |
|--------------------------------------------------------|-------------------|----------------|
|                                                        | Benjamin          | White          |
| Birmingham Women's and Children's NHS Foundation Trust | Rafeeq            | Muhammed       |
|                                                        | Rehana            | Bi             |
|                                                        | Catherine         | Cotter         |
|                                                        | Jayne             | Grove          |
|                                                        | Kate              | Hong           |
|                                                        | Ruth              | Howman         |
|                                                        | Monica            | Mitchell       |
|                                                        | Sugrah            | Sultan         |
| Bolton NHS Foundation Trust                            | Salil             | Singh          |
|                                                        | Chris             | Dawe           |
|                                                        | Robert            | Hull           |
|                                                        | Natalie           | Silva          |
| Borders General Hospital                               | Jonathan          | Manning        |
|                                                        | Lauren            | Finlayson      |
| Calderdale and Huddersfield NHS Foundation Trust       | Sunil             | Sonwalkar      |
|                                                        | Naomi             | Chambers       |
|                                                        | Andrew            | Haigh          |
|                                                        | Lear              | Matapure       |
| Cambridge University Hospitals NHS Foundation Trust    | Tim               | Raine          |
|                                                        | Varun             | George         |
|                                                        | Christina         | Kapizioni      |
|                                                        | Konstantina       | Strongili      |
|                                                        | Tina              | Thompson       |
| Chelsea and Westminster Hospital NHS Foundation Trust  | Philip            | Hendy          |
|                                                        | Rhian             | Bull           |
|                                                        | Patricia          | Costa          |

| <b>Affiliation</b>                                   | <b>First name</b> | <b>Surname</b> |
|------------------------------------------------------|-------------------|----------------|
|                                                      | Lisa              | Davey          |
|                                                      | Hayley            | Hannington     |
|                                                      | Kribashnie        | Nundlall       |
|                                                      | Catarina          | Martins        |
|                                                      | Laura             | Avanzi         |
|                                                      | Jaime             | Carungcong     |
|                                                      | Sabrina           | Barr           |
| Chesterfield Royal Hospital                          | Kath              | Phillis        |
|                                                      | Rachel            | Gascoyne       |
| Countess Of Chester Hospital<br>NHS Foundation Trust | Ian               | London         |
|                                                      | Jenny             | Grounds        |
|                                                      | Emmeline          | Martin         |
|                                                      | Susie             | Pajak          |
| Darlington Memorial Hospital                         | Anjan             | Dhar           |
|                                                      | Ellen             | Brown          |
|                                                      | Amanda            | Cowton         |
|                                                      | Kimberley         | Stamp          |
| Dartford and Gravesham NHS<br>Trust                  | Ben               | Warner         |
|                                                      | Carmel            | Stuart         |
|                                                      | Louise            | Lacey          |
| The Dudley Group NHS<br>Foundation Trust             | Shanika           | de Silva       |
|                                                      | Clare             | Allcock        |
|                                                      | Philip            | Harvey         |
| East and North Hertfordshire NHS<br>Trust            | Johanne           | Brooks         |
|                                                      | Pearl             | Baker          |
|                                                      | Hannah            | Beadle         |
|                                                      | Carina            | Cruz           |

| <b>Affiliation</b>                                | <b>First name</b> | <b>Surname</b>  |
|---------------------------------------------------|-------------------|-----------------|
|                                                   | Debbie            | Potter          |
| East Lancashire Hospitals NHS Trust               | Joe               | Collum          |
|                                                   | Farzana           | Masters         |
| East Suffolk and North Essex NHS Foundation Trust | Achuth            | Shenoy          |
|                                                   | Alison            | O'Kelly         |
| Glangwili Hospital                                | Aashish           | Kumar           |
|                                                   | Samantha          | Coetzee         |
|                                                   | Mihaela           | Peiu            |
| Great Ormond Street Hospital                      | Edward            | Gaynor          |
|                                                   | Sibongile         | Chadokufa       |
|                                                   | Bonita            | Huggett         |
|                                                   | Hamza             | Meghari         |
|                                                   | Sara              | El-Khouly       |
|                                                   | Fevronia          | Kiparissi       |
|                                                   | Waffa             | Girshab         |
| Great Western Hospitals NHS Foundation Trust      | Andrew            | Claridge        |
|                                                   | Emily             | Fowler          |
|                                                   | Laura             | McCafferty      |
| Guy's and St Thomas' NHS Foundation Trust         | Peter             | Irving          |
|                                                   | Karolina          | Christodoulides |
|                                                   | Angela            | Clifford        |
|                                                   | Patrick           | Dawson          |
|                                                   | Sailish           | Honap           |
|                                                   | Samuel            | Lim             |
|                                                   | Raphael           | Luber           |
|                                                   | Karina            | Mahiouz         |
|                                                   | Susanna           | Meade           |

| <b>Affiliation</b>                            | <b>First name</b> | <b>Surname</b> |
|-----------------------------------------------|-------------------|----------------|
|                                               | Parizade          | Raymode        |
|                                               | Rebecca           | Reynolds       |
|                                               | Anna              | Stanton        |
|                                               | Sherill           | Tripoli        |
|                                               | Naomi             | Hare           |
| The Hillingdon Hospitals NHS Foundation Trust | Yih Harn          | Siaw           |
|                                               | Lane              | Manzano        |
|                                               | Jonathan          | Segal          |
|                                               | Ibrahim           | Al-Bakir       |
|                                               | Imran             | Khakoo         |
| Homerton University Hospital Foundation Trust | Nora              | Thoua          |
|                                               | Katherine         | Davidson       |
|                                               | Jagrul            | Miah           |
|                                               | Alex              | Hall           |
| Hull University Teaching Hospitals NHS Trust  | Shaji             | Sebastian      |
|                                               | Melony            | Hayes          |
|                                               | Sally             | Myers          |
|                                               | Alison            | Talbot         |
|                                               | Jack              | Turnbull       |
|                                               | Emma              | Whitehead      |
|                                               | Katie             | Stamp          |
|                                               | Alison            | Pattinson      |
|                                               | Vergheese         | Mathew         |
|                                               | Leanne            | Sherris        |
| Imperial College Healthcare NHS Trust         | Lucy              | Hicks          |
|                                               | Tara-Marie        | Byrne          |
|                                               | Leilani           | Cabrerros      |

| <b>Affiliation</b>                                        | <b>First name</b> | <b>Surname</b> |
|-----------------------------------------------------------|-------------------|----------------|
|                                                           | Hannah            | Downing-Wood   |
|                                                           | Sophie            | Hunter         |
|                                                           | Mohammad Aamir    | Saifuddin      |
|                                                           | Hemanth           | Prabhudev      |
|                                                           | Sharmili          | Balarajah      |
| James Paget University Hospitals NHS Foundation Trust     | Helen             | Sutherland     |
| Kettering General Hospital                                | Ajay M            | Verma          |
|                                                           | Juliemol          | Sebastian      |
|                                                           | Mohammad Farhad   | Peerally       |
| King's College Hospital NHS Foundation Trust              | Alexandra         | Kent           |
|                                                           | Lee Meng          | Choong         |
|                                                           | Benedetta         | Pantaloni      |
|                                                           | Pantelis          | Ravdas         |
| King's College Hospital NHS Foundation Trust (paediatric) | Babu              | Vadamalayan    |
| King's Mill Hospital                                      | Stephen           | Foley          |
|                                                           | Becky             | Arnold         |
|                                                           | Cheryl            | Heeley         |
|                                                           | Wayne             | Lovegrove      |
| Liverpool University Hospitals NHS Foundation Trust       | Philip J          | Smith          |
|                                                           | Giovanna          | Bretland       |
|                                                           | Sarah             | King           |
|                                                           | Martina           | Lofthouse      |
|                                                           | Lindsey           | Rigby          |
|                                                           | Sreedhar          | Subramanian    |
|                                                           | David             | Tyrer          |
|                                                           | Kate              | Martin         |

| <b>Affiliation</b>                                   | <b>First name</b> | <b>Surname</b> |
|------------------------------------------------------|-------------------|----------------|
|                                                      | Christopher       | Probert        |
| London North West University<br>Healthcare NHS Trust | Nikolaos          | Kamperidis     |
|                                                      | Temi              | Adedoyin       |
|                                                      | Manisha           | Baden          |
|                                                      | Jeannette         | Brown          |
|                                                      | Feba              | Chacko         |
|                                                      | Michela           | Cicchetti      |
|                                                      | Mohammad          | Saifuddin      |
|                                                      | Priya             | Yesupatham     |
| Maidstone and Tunbridge Wells<br>NHS Trust           | Rohit             | Gowda          |
|                                                      | Maureen           | Williams       |
| Manchester University NHS<br>Foundation Trust        | Karen             | Kemp           |
|                                                      | Rima              | Akhand         |
|                                                      | Glaxy             | Gray           |
|                                                      | Anu               | John           |
|                                                      | Maya              | John           |
|                                                      | Diamond           | Sathe          |
|                                                      | Jennifer          | Soren          |
| The Mid Yorkshire Hospitals NHS<br>Trust             | Michael           | Sprakes        |
|                                                      | Julie             | Burton         |
|                                                      | Patricia          | Kane           |
|                                                      | Stephanie         | Lupton         |
| Milton Keynes University<br>Hospital                 | George            | MacFaul        |
|                                                      | Diane             | Scaletta       |
|                                                      | Loria             | Siamia         |
|                                                      | Felicity          | Williams       |
| Newcastle Hospitals NHS                              | Chris             | Lamb           |



| <b>Affiliation</b>                                            | <b>First name</b> | <b>Surname</b> |
|---------------------------------------------------------------|-------------------|----------------|
| Foundation Trust                                              | Mary              | Doona          |
|                                                               | Ashleigh          | Hogg           |
|                                                               | Lesley            | Jeffrey        |
|                                                               | Andrew            | King           |
|                                                               | R Alexander       | Speight        |
| Ninewells Hospital & Medical School                           | Craig             | Mowat          |
|                                                               | Debbie            | Rice           |
|                                                               | Susan             | MacFarlane     |
|                                                               | Anne              | MacLeod        |
|                                                               | Samera            | Mohammed       |
| Norfolk and Norwich University Hospitals NHS Foundation Trust | Mary              | Anne Morris    |
|                                                               | Louise            | Coke           |
|                                                               | Grace             | Hindle         |
|                                                               | Eirini            | Kolokouri      |
|                                                               | Catherine         | Wright         |
| North Bristol NHS Trust                                       | Melanie           | Lockett        |
|                                                               | Charlotte         | Cranfield      |
|                                                               | Louise            | Jennings       |
|                                                               | Ankur             | Srivastava     |
|                                                               | Lana              | Ward           |
|                                                               | Nouf              | Jeynes         |
| North Tyneside General Hospital                               | Praveen           | Rajasekhar     |
|                                                               | Lisa              | Gallagher      |
|                                                               | Linda             | Patterson      |
|                                                               | Jill              | Ward           |
|                                                               | Rae               | Basnett        |
|                                                               | Judy              | Murphy         |

| <b>Affiliation</b>                                | <b>First name</b> | <b>Surname</b> |
|---------------------------------------------------|-------------------|----------------|
|                                                   | Lauren            | Parking        |
|                                                   | Emma              | Lawson         |
| Nottingham University Hospitals NHS Trust         | David             | Devadason      |
|                                                   | Gordon            | Moran          |
|                                                   | Neelam            | Khan           |
|                                                   | Lauren            | Tarr           |
| The Pennine Acute Hospitals NHS Trust             | Jimmy             | Limdi          |
|                                                   | Kay               | Goulden        |
|                                                   | Asad              | Javed          |
|                                                   | Lauren            | McKenzie       |
| Portsmouth Hospitals NHS Trust                    | Pradeep           | Bhandari       |
|                                                   | Michelle          | Baker-Moffatt  |
|                                                   | Joanne            | Dash           |
| The Queen Elizabeth Hospital Kings Lynn NHS Trust | Alan              | Wiles          |
|                                                   | Hannah            | Bloxham        |
|                                                   | Jose              | Dias           |
|                                                   | Ellie             | Graham         |
| Queen Elizabeth University Hospital, Glasgow      | Jonathan          | Macdonald      |
|                                                   | Shona             | Finan          |
|                                                   | Faye              | McMeeken       |
|                                                   | Stephanie         | Shields        |
|                                                   | John Paul         | Seenan         |
| Royal Berkshire NHS Foundation Trust              | Des               | DeSilva        |
|                                                   | Ofori             | Boateng        |
|                                                   | Holly             | Lawrence       |
|                                                   | Susanna           | Malkakorpi     |
| The Royal Bournemouth and                         | Simon             | Whiteoak       |

| <b>Affiliation</b>                          | <b>First name</b> | <b>Surname</b> |
|---------------------------------------------|-------------------|----------------|
| Christchurch Hospitals NHS Foundation Trust | Kelli             | Edger-Earley   |
| Royal Cornwall Hospitals NHS Trust          | Sarah             | Ingram         |
|                                             | Sharon            | Botfield       |
|                                             | Fiona             | Hammonds       |
|                                             | Clare             | James          |
| Royal Devon and Exeter NHS Foundation Trust | Tariq             | Ahmad          |
|                                             | Gemma             | Aspinall       |
|                                             | Sarah             | Hawkins        |
|                                             | Suzie             | Marriott       |
|                                             | Clare             | Redstone       |
|                                             | Halina            | Windak         |
| Royal Free London NHS Foundation Trust      | Charles           | Murray         |
|                                             | Cynthia           | Diaba          |
|                                             | Fexy              | Joseph         |
|                                             | Glykeria          | Pakou          |
| Royal Glamorgan Hospital                    | James             | Berrill        |
|                                             | Natalie           | Stroud         |
|                                             | Carla             | Pothecary      |
|                                             | Lisa              | Roche          |
|                                             | Keri              | Turner         |
|                                             | Lisa              | Deering        |
|                                             | Lynda             | Israel         |
| Royal Gwent Hospital                        | Evelyn            | Baker          |
|                                             | Sean              | Cutler         |
|                                             | Rina              | Mardania Evans |
|                                             | Maxine            | Nash           |

| <b>Affiliation</b>                          | <b>First name</b> | <b>Surname</b> |
|---------------------------------------------|-------------------|----------------|
| Royal Hampshire County Hospital             | John              | Gordon         |
|                                             | Emma              | Levell         |
|                                             | Silvia            | Zagalo         |
| Royal Hospital for Sick Children, Edinburgh | Richard           | Russell        |
|                                             | Paul              | Henderson      |
|                                             | Margaret          | Millar         |
| Royal Manchester Children's Hospital        | Andrew            | Fagbemi        |
|                                             | Felicia           | Jennings       |
|                                             | Imelda            | Mayor          |
|                                             | Jill              | Wilson         |
| Royal Surrey County Hospital                | Christopher       | Alexakis       |
|                                             | Natalia           | Michalak       |
| Royal United Hospitals Bath                 | John              | Saunders       |
|                                             | Helen             | Burton         |
|                                             | Vanessa           | Cambridge      |
|                                             | Tonia             | Clark          |
|                                             | Charlotte         | Ekblad         |
|                                             | Sarah             | Hierons        |
|                                             | Joyce             | Katebe         |
|                                             | Emma              | Saunbury       |
|                                             | Rachel            | Perry          |
| The Royal Wolverhampton NHS Trust           | Matthew           | Brookes        |
|                                             | Kathryn           | Davies         |
|                                             | Marie             | Green          |
|                                             | Ann               | Plumbe         |
| Salford Royal NHS Foundation Trust          | Clare             | Ormerod        |
|                                             | Helen             | Christensen    |

| <b>Affiliation</b>                                | <b>First name</b> | <b>Surname</b> |
|---------------------------------------------------|-------------------|----------------|
|                                                   | Anne              | Keen           |
|                                                   | Jonathan          | Ogor           |
| Salisbury District Hospital                       | Alpha             | Anthony        |
|                                                   | Emily             | Newitt         |
| Sandwell and West Birmingham NHS Trust            | Edward            | Fogden         |
|                                                   | Kalisha           | Russell        |
| Sheffield Teaching Hospitals NHS Foundation Trust | Anne              | Phillips       |
|                                                   | Muaad             | Abdulla        |
| Shrewsbury and Telford Hospital NHS Trust         | Jeff              | Butterworth    |
|                                                   | Colene            | Adams          |
|                                                   | Elizabeth         | Buckingham     |
|                                                   | Danielle          | Childs         |
|                                                   | Alison            | Magness        |
|                                                   | Jo                | Stickley       |
| Singleton Hospital                                | Caradog           | Thomas         |
|                                                   | Elaine            | Brinkworth     |
|                                                   | Lynda             | Connor         |
|                                                   | Amanda            | Cook           |
|                                                   | Tabitha           | Rees           |
| Somerset NHS Foundation Trust                     | Emma              | Wesley         |
|                                                   | Alison            | Moss           |
| South Tees Hospitals NHS Foundation Trust         | Arvind            | Ramadas        |
|                                                   | Julie             | Tregonning     |
| Southend University Hospital NHS Foundation Trust | Ioannis           | Koumoutsos     |
|                                                   | Viji              | George         |
|                                                   | Swapna            | Kunhunny       |
|                                                   | Sophie            | Laverick       |

| <b>Affiliation</b>                                                       | <b>First name</b> | <b>Surname</b> |
|--------------------------------------------------------------------------|-------------------|----------------|
| St George's University Hospitals<br>NHS Foundation Trust                 | Kamal             | Patel          |
|                                                                          | Mariam            | Ali            |
|                                                                          | Hilda             | Mhandu         |
|                                                                          | Aleem             | Rana           |
|                                                                          | Katherine         | Spears         |
|                                                                          | Joana             | Teixeira       |
|                                                                          | Richard           | Pollok         |
|                                                                          | Mark              | Mencias        |
|                                                                          | Abigail           | Seaward        |
|                                                                          | Jessica           | Sousa          |
| St George's University Hospitals<br>NHS Foundation Trust<br>(paediatric) | Nicholas          | Reps           |
|                                                                          | Rebecca           | Martin         |
| St James's University Hospital                                           | Christian         | Selinger       |
|                                                                          | Jenelyn           | Carbonell      |
|                                                                          | Felicia           | Onovira        |
|                                                                          | Doris             | Quartey        |
| Stockport NHS Foundation Trust                                           | Zahid             | Mahmood        |
|                                                                          | Racheal           | Campbell       |
|                                                                          | Liane             | Marsh          |
| Surrey and Sussex Healthcare<br>NHS Trust                                | Monira            | Rahman         |
|                                                                          | Sarah             | Davies         |
|                                                                          | Ruth              | Habibi         |
|                                                                          | Ellen             | Jessup-Dunton  |
|                                                                          | Teishel           | Joefield       |
|                                                                          | Reina             | Layug          |
| Tameside and Glossop<br>Integrated Care NHS<br>Foundation Trust          | Vinod             | Patel          |
|                                                                          | Joanne            | Vere           |

| <b>Affiliation</b>                                            | <b>First name</b> | <b>Surname</b> |
|---------------------------------------------------------------|-------------------|----------------|
| Torbay and South Devon NHS Foundation Trust                   | Gareth            | Walker         |
|                                                               | Stacey            | Atkins         |
|                                                               | Jasmine           | Growdon        |
|                                                               | Charlotte         | McNeill        |
| University Hospitals Birmingham NHS Foundation Trust          | Rachel            | Cooney         |
|                                                               | Lillie            | Bennett        |
|                                                               | Louise            | Bowlas         |
|                                                               | Sharafaath        | Shariff        |
| University Hospitals Bristol NHS Foundation Trust             | Aileen            | Fraser         |
|                                                               | Katherine         | Belfield       |
| University Hospitals of Derby and Burton NHS Foundation Trust | Said              | Din            |
|                                                               | Catherine         | Addleton       |
|                                                               | Marie             | Appleby        |
|                                                               | Johanna           | Brown          |
|                                                               | Kathleen          | Holding        |
| University Hospitals of Leicester NHS Trust                   | John              | deCaestecker   |
|                                                               | Olivia            | Watchorn       |
| University Hospitals Plymouth NHS Trust                       | Chris             | Hayward        |
|                                                               | Susan             | Inniss         |
|                                                               | Lucy              | Pritchard      |
| United Lincolnshire Hospitals NHS Trust                       | Jervoise          | Andreyev       |
|                                                               | Caroline          | Hayhurst       |
|                                                               | Carol             | Lockwood       |
|                                                               | Lynn              | Osborne        |
|                                                               | Amanda            | Roper          |
|                                                               | Karen             | Warner         |
|                                                               | Julia             | Hindle         |

| <b>Affiliation</b>                                          | <b>First name</b> | <b>Surname</b> |
|-------------------------------------------------------------|-------------------|----------------|
| University College London<br>Hospitals NHS Foundation Trust | Shameer           | Mehta          |
|                                                             | James             | Bell           |
|                                                             | William           | Blad           |
|                                                             | Lisa              | Whitley        |
| University Hospital Llandough                               | Durai             | Dhamaraj       |
|                                                             | Mark              | Baker          |
| University Hospital Southampton<br>NHS Foundation Trust     | Fraser            | Cummings       |
|                                                             | Clare             | Harris         |
|                                                             | Amy               | Jones          |
|                                                             | Liga              | Krauze         |
|                                                             | Sohail            | Rahmany        |
|                                                             | Audrey            | Torokwa        |
| University Hospital of Wales<br>(paediatric)                | Amar              | Wahid          |
|                                                             | Zoe               | Morrison       |
| West Hertfordshire Hospitals<br>NHS Trust                   | Rakesh            | Chaudhary      |
|                                                             | Melanie           | Claridge       |
|                                                             | Chiara            | Ellis          |
|                                                             | Cheryl            | Kemp           |
|                                                             | Ogwa              | Tobi           |
| West Middlesex University<br>Hospital                       | Emma              | Johnston       |
|                                                             | Metod             | Oblak          |
|                                                             | Richard           | Appleby        |
| West Suffolk NHS Foundation<br>Trust                        | Marium            | Asghar         |
| Western General Hospital                                    | Charlie           | Lees           |
|                                                             | Debbie            | Alexander      |
|                                                             | Kate              | Covil          |



| <b>Affiliation</b>                            | <b>First name</b> | <b>Surname</b> |
|-----------------------------------------------|-------------------|----------------|
|                                               | Lauranne          | Derikx         |
|                                               | Sryros            | Siakavellas    |
|                                               | Helen             | Baxter         |
|                                               | Scott             | Robertson      |
| Withybush General Hospital                    | Kerrie            | Johns          |
|                                               | Rachel            | Hughes         |
|                                               | Janet             | Phipps         |
|                                               | Abigail           | Taylor         |
| Yeovil District Hospital NHS Foundation Trust | Katie             | Smith          |
|                                               | Linda             | Howard         |
|                                               | Dianne            | Wood           |
| York Teaching Hospital NHS Foundation Trust   | Ajay              | Muddu          |
|                                               | Laura             | Barman         |
|                                               | Janine            | Mallinson      |
| Ysbyty Gwynedd                                | Iona              | Thomas         |
|                                               | Kelly             | Andrews        |
|                                               | Caroline          | Mulvaney Jones |
|                                               | Julia             | Roberts        |

## Supplementary Table S2: Baseline characteristics of all participants in CLARITY IBD following primary vaccination against SARS-CoV-2, stratified by biologic

| Variable                                 |                                        | Infliximab            | Vedolizumab           | Overall               | p       |
|------------------------------------------|----------------------------------------|-----------------------|-----------------------|-----------------------|---------|
| Vaccine                                  | BNT162b2                               | 46.7% (741/1587)      | 45.1% (342/758)       | 46.2% (1083/2345)     | 0.48    |
|                                          | ChAdOx1 nCoV-19                        | 53.3% (846/1587)      | 54.9% (416/758)       | 53.8% (1262/2345)     |         |
| Age (years)                              |                                        | 41.2 (31.0 - 54.4)    | 51.0 (37.0 - 63.8)    | 43.8 (32.4 - 57.4)    | <0.0001 |
| Sex                                      | Female                                 | 48.6% (770/1585)      | 48.6% (367/755)       | 48.6% (1137/2340)     | 0.47    |
|                                          | Male                                   | 51.4% (814/1585)      | 51.1% (386/755)       | 51.3% (1200/2340)     |         |
|                                          | Intersex                               | 0.0% (0/1585)         | 0.0% (0/755)          | 0.0% (0/2340)         |         |
|                                          | Prefer not to say                      | 0.1% (1/1585)         | 0.3% (2/755)          | 0.1% (3/2340)         |         |
| Ethnicity                                | White                                  | 92.3% (1461/1583)     | 90.3% (679/752)       | 91.6% (2140/2335)     | 0.38    |
|                                          | Asian                                  | 4.9% (77/1583)        | 6.5% (49/752)         | 5.4% (126/2335)       |         |
|                                          | Mixed                                  | 1.6% (26/1583)        | 1.9% (14/752)         | 1.7% (40/2335)        |         |
|                                          | Black                                  | 0.8% (13/1583)        | 0.7% (5/752)          | 0.8% (18/2335)        |         |
|                                          | Other                                  | 0.4% (6/1583)         | 0.7% (5/752)          | 0.5% (11/2335)        |         |
| Diagnosis                                | Crohn's disease                        | 63.7% (1011/1587)     | 38.7% (293/758)       | 55.6% (1304/2345)     | <0.0001 |
|                                          | Ulcerative colitis or IBD-unclassified | 36.3% (576/1587)      | 61.3% (465/758)       | 44.4% (1041/2345)     |         |
| Duration of IBD (years)                  |                                        | 8.0 (4.0 - 16.0)      | 10.0 (4.0 - 18.0)     | 9.0 (4.0 - 16.0)      | 0.00035 |
| Age at IBD diagnosis (years)             |                                        | 28.6 (20.9 - 41.7)    | 35.3 (24.2 - 49.2)    | 30.3 (21.6 - 44.1)    | <0.0001 |
| Immunomodulators at vaccine              |                                        | 61.0% (968/1586)      | 21.4% (162/756)       | 48.2% (1130/2342)     | <0.0001 |
| 5-ASA                                    |                                        | 22.8% (362/1586)      | 32.7% (247/756)       | 26.0% (609/2342)      | <0.0001 |
| Steroids                                 |                                        | 3.3% (52/1586)        | 7.7% (58/756)         | 4.7% (110/2342)       | <0.0001 |
| BMI (kg/m <sup>2</sup> )                 |                                        | 25.9 (22.8 - 30.3)    | 26.0 (23.1 - 30.2)    | 26.0 (22.9 - 30.2)    | 0.72    |
| Heart disease                            |                                        | 3.0% (48/1587)        | 6.2% (47/758)         | 4.1% (95/2345)        | 0.00046 |
| Diabetes                                 |                                        | 3.5% (55/1587)        | 8.3% (63/758)         | 5.0% (118/2345)       | <0.0001 |
| Lung disease                             |                                        | 13.7% (218/1587)      | 18.2% (138/758)       | 15.2% (356/2345)      | 0.0056  |
| Kidney disease                           |                                        | 1.1% (18/1587)        | 2.2% (17/758)         | 1.5% (35/2345)        | 0.045   |
| Cancer                                   |                                        | 0.3% (5/1587)         | 2.2% (17/758)         | 0.9% (22/2345)        | <0.0001 |
| Smoker                                   | Yes                                    | 9.7% (153/1580)       | 7.3% (55/753)         | 8.9% (208/2333)       | 0.0030  |
|                                          | Not currently                          | 32.8% (519/1580)      | 39.6% (298/753)       | 35.0% (817/2333)      |         |
|                                          | Never                                  | 57.5% (908/1580)      | 53.1% (400/753)       | 56.1% (1308/2333)     |         |
| Exposure to documented cases of COVID-19 |                                        | 10.2% (161/1581)      | 9.3% (70/754)         | 9.9% (231/2335)       | 0.55    |
| Income deprivation score                 |                                        | 0.092 (0.054 - 0.153) | 0.088 (0.055 - 0.146) | 0.091 (0.054 - 0.151) | 0.72    |
| Active disease (PRO2)                    |                                        | 6.1% (92/1513)        | 12.4% (89/718)        | 8.1% (181/2231)       | <0.0001 |

Table includes participants with antibody levels measured outside of the week 3-10 window as well as those with prior infection or with two doses of vaccine; this represents all participants included in figures 1-5 of the main paper.

**Abbreviations:** IBD = inflammatory bowel disease; 5-ASA = 5-aminosalicylic acid; BMI = Body Mass Index; PRO2 = IBD disease activity.

Values presented are median (interquartile range) or percentage (numerator/denominator). P values represent the results of a Mann Whitney U, Kruskal Wallis or Fisher's exact test.

Supplementary Table S3: Baseline characteristics of participants who had anti-SARS-CoV-2 spike antibodies measured 3 to 10 weeks following primary vaccination against SARS-CoV-2, stratified by vaccine administered

| Variable                                 |                                        | BNT162b2              | ChAdOx1 nCoV-19       | Overall               | p     |
|------------------------------------------|----------------------------------------|-----------------------|-----------------------|-----------------------|-------|
| Biologic                                 | Vedolizumab                            | 34.3% (202/589)       | 32.1% (226/704)       | 33.1% (428/1293)      | 0.41  |
|                                          | Infliximab                             | 65.7% (387/589)       | 67.9% (478/704)       | 66.9% (865/1293)      |       |
| Age (years)                              |                                        | 43.9 (32.1 - 56.3)    | 43.8 (33.3 - 58.9)    | 43.8 (32.8 - 57.6)    | 0.51  |
| Sex                                      | Female                                 | 48.4% (285/589)       | 49.9% (349/699)       | 49.2% (634/1288)      | 0.52  |
|                                          | Male                                   | 51.4% (303/589)       | 50.1% (350/699)       | 50.7% (653/1288)      |       |
|                                          | Intersex                               | 0.0% (0/589)          | 0.0% (0/699)          | 0.0% (0/1288)         |       |
|                                          | Prefer not to say                      | 0.2% (1/589)          | 0.0% (0/699)          | 0.1% (1/1288)         |       |
| Ethnicity                                | White                                  | 90.0% (530/589)       | 92.1% (642/697)       | 91.1% (1172/1286)     | 0.65  |
|                                          | Asian                                  | 6.6% (39/589)         | 5.6% (39/697)         | 6.1% (78/1286)        |       |
|                                          | Mixed                                  | 2.4% (14/589)         | 1.4% (10/697)         | 1.9% (24/1286)        |       |
|                                          | Black                                  | 0.7% (4/589)          | 0.6% (4/697)          | 0.6% (8/1286)         |       |
|                                          | Other                                  | 0.3% (2/589)          | 0.3% (2/697)          | 0.3% (4/1286)         |       |
| Diagnosis                                | Crohn's disease                        | 55.7% (328/589)       | 58.5% (412/704)       | 57.2% (740/1293)      | 0.31  |
|                                          | Ulcerative colitis or IBD-unclassified | 44.3% (261/589)       | 41.5% (292/704)       | 42.8% (553/1293)      |       |
| Duration of IBD (years)                  |                                        | 9.0 (4.0 - 16.0)      | 9.0 (4.0 - 17.0)      | 9.0 (4.0 - 16.0)      | 0.38  |
| Age at IBD diagnosis (years)             |                                        | 30.0 (21.9 - 42.6)    | 30.6 (21.9 - 44.5)    | 30.3 (21.9 - 43.7)    | 0.60  |
| Immunomodulators at vaccine              |                                        | 45.9% (270/588)       | 50.7% (357/704)       | 48.5% (627/1292)      | 0.094 |
| 5-ASA                                    |                                        | 25.0% (147/588)       | 26.6% (187/704)       | 25.9% (334/1292)      | 0.57  |
| Steroids                                 |                                        | 4.6% (27/588)         | 5.0% (35/704)         | 4.8% (62/1292)        | 0.79  |
| BMI (kg/m <sup>2</sup> )                 |                                        | 25.6 (22.7 - 30.2)    | 26.1 (23.1 - 30.6)    | 26.0 (22.9 - 30.4)    | 0.21  |
| Heart disease                            |                                        | 5.4% (32/589)         | 3.8% (27/704)         | 4.6% (59/1293)        | 0.18  |
| Diabetes                                 |                                        | 4.9% (29/589)         | 5.1% (36/704)         | 5.0% (65/1293)        | 0.90  |
| Lung disease                             |                                        | 15.1% (89/589)        | 15.1% (106/704)       | 15.1% (195/1293)      | 1.0   |
| Kidney disease                           |                                        | 1.5% (9/589)          | 1.4% (10/704)         | 1.5% (19/1293)        | 1.0   |
| Cancer                                   |                                        | 1.0% (6/589)          | 1.0% (7/704)          | 1.0% (13/1293)        | 1.0   |
| Smoker                                   | Yes                                    | 7.5% (44/588)         | 9.0% (63/699)         | 8.3% (107/1287)       | 0.042 |
|                                          | Not currently                          | 32.3% (190/588)       | 37.6% (263/699)       | 35.2% (453/1287)      |       |
|                                          | Never                                  | 60.2% (354/588)       | 53.4% (373/699)       | 56.5% (727/1287)      |       |
| Exposure to documented cases of COVID-19 |                                        | 11.2% (66/588)        | 7.4% (52/699)         | 9.2% (118/1287)       | 0.020 |
| Income deprivation score                 |                                        | 0.081 (0.049 - 0.141) | 0.090 (0.054 - 0.151) | 0.086 (0.052 - 0.147) | 0.057 |
| Active disease (PRO2)                    |                                        | 7.8% (44/567)         | 6.4% (43/669)         | 7.0% (87/1236)        | 0.37  |

**Abbreviations:** IBD = inflammatory bowel disease; 5-ASA = 5-aminosalicylic acid; BMI = Body Mass Index; PRO2 = IBD disease activity.

Values presented are median (interquartile range) or percentage (numerator/denominator). P values represent the results of a Mann Whitney U, Kruskal Wallis or Fisher's exact test.
